# Supplementary material for: Copper ion salts of arylthiotetrathiafulvalenes: synthesis, structure diversity and magnetic properties
Source: publisher site journal article supplement (doi:10.3762/bjoc.11.95), 2015-05-20
Supplement: Additional file 1 [file 1860-5397-11-95-S1.pdf]

# Supporting Information

for

## **Copper ion salts of arylthiotetrathiafulvalenes: synthesis, structure diversity and magnetic properties**

Longfei Ma, Jibin Sun, Xiaofeng Lu, Shangxi Zhang, Hui Qi, Lei Liu, Yongliang Shao and Xiangfeng Shao\*

Address: State Key Laboratory of Applied Organic Chemistry, Lanzhou University, Tianshui Southern Road 222, Lanzhou 730000, Gansu Province, China

Email: Xiangfeng Shao - [shaof@lzu.edu.cn](mailto:shaof@lzu.edu.cn)

\*Corresponding author

**Selected crystallographic data, crystal structures of  $2 \cdot \text{CuBr}_4$  and  $7 \cdot \text{CuBr}_2$ , and variations of molecular geometries of TTFs at different oxidation states**

## Materials and general methods

CuBr<sub>2</sub> was purchased from Shanghai Xinbao Fine Chemical Factory (Shanghai, China). tetrahydrofuran(THF) and acetonitrile (CH<sub>3</sub>CN) were distilled over CaH<sub>2</sub> and stored under N<sub>2</sub> atmosphere. **1–7** were synthesized by following our previous report [1].

The electrochemical properties of **1–7** were recorded on a RST 5000 electrochemical workstation at a scan rate of 50 mV s<sup>-1</sup>, with glassy carbon discs as the working electrode, Pt wire as the counter electrode, and SCE electrode as the reference electrode. The concentration was 5 × 10<sup>-4</sup> mol L<sup>-1</sup> in CH<sub>2</sub>Cl<sub>2</sub>, and the supporting electrolyte was (*n*-Bu)<sub>4</sub>N·PF<sub>6</sub> (0.1 mol L<sup>-1</sup>). The measurement was performed at 20 °C after bubbling the solution with N<sub>2</sub> gas for 15 min.

The X-ray diffraction measurement was carried out on SuperNova (Agilent) type diffractometer. The crystal structure was solved by a direct method SIR2004 [2] and refined by full-matrix least-squares method on  $F^2$  by means of SHELXL-97 [3]. The X-Ray powder diffraction (XRPD) pattern was recorded on X'Pert PRO (PANalytical). The temperature dependence of the magnetic susceptibility was measured on a SQUID magnetometer of Quantum Design MPMS-XL applying a magnetic field of 1000 Oe. The data were corrected for core diamagnetism estimated from the sum of the Pascal constants [4].

## References

- [1] a) Sun, J.; Lu, X.; Shao, J.; Li, X.; Zhang, S.; Wang, B.; Zhao, J.; Shao, Y.; Fang, R.; Wang, Z.; Yu, W.; Shao, X. *Chem. Eur. J.* **2013**, *19*, 12517; doi: 10.1002/chem.201301819 b) Sun, J.; Lu, X.; Shao, J.; Cui, Z.; Shao, Y.; Jiang, G.; Yu, W.; Shao, X. *RSC Adv.* **2013**, *3*, 10193. doi: 10.1039/C3RA41349G
- [2] Burla, M. C.; Caliendo, R.; Camalli, M.; Carrozzini, B.; Cascarano, G. L.; de Caro, L.; Giacovazzo, C.; Polidori, G.; Spagna, R. *J. Appl. Cryst.* **2005**, *38*, 381–388. doi: 10.1107/S002188980403225X
- [3] Sheldrick, G. M. *SHELXL-97, A Program for Crystal Structure Refinement*. University of Göttingen, Göttingen, Germany, **1997**.
- [4] Gupta, R. R.; *Landolt-Bornstein, New Series II* (Eds: K. -H. Hellwege, A. M. Hellwege), Springer Verlag, Berlin, **1986**, vol. 16 (Diamagnetism Susceptibility)

**Table S1:** Selected crystallographic data for **1**·CuBr<sub>4</sub>, **2**·CuBr<sub>4</sub>, and **3**·(CuBr<sub>4</sub>)<sub>0.5</sub>·CuBr<sub>3</sub>·THF.

|                                               | <b>1</b> ·CuBr <sub>4</sub>                                      | <b>2</b> ·CuBr <sub>4</sub>                                      | <b>3</b> ·(CuBr <sub>4</sub> ) <sub>0.5</sub> ·CuBr <sub>3</sub> ·THF                           |                                                                                                 |
|-----------------------------------------------|------------------------------------------------------------------|------------------------------------------------------------------|-------------------------------------------------------------------------------------------------|-------------------------------------------------------------------------------------------------|
| CCDC number                                   | 1046215                                                          | 1046216                                                          | 1046217                                                                                         | 1046218                                                                                         |
| Empirical formula                             | C <sub>30</sub> H <sub>20</sub> S <sub>8</sub> CuBr <sub>4</sub> | C <sub>34</sub> H <sub>28</sub> S <sub>8</sub> CuBr <sub>4</sub> | C <sub>76</sub> H <sub>72</sub> O <sub>2</sub> S <sub>16</sub> Cu <sub>3</sub> Br <sub>10</sub> | C <sub>76</sub> H <sub>72</sub> O <sub>2</sub> S <sub>16</sub> Cu <sub>3</sub> Br <sub>10</sub> |
| Formula weight                                | 1020.12                                                          | 1076.22                                                          | 2520.02                                                                                         | 2520.02                                                                                         |
| Temperature / K                               | 293(2)                                                           | 293(2)                                                           | 173(2)                                                                                          | 291(2)                                                                                          |
| $\lambda$ / Å                                 | 1.54184                                                          | 0.71073                                                          | 0.71073                                                                                         | 0.71073                                                                                         |
| Crystal size / mm <sup>3</sup>                | 0.31×0.05×0.04                                                   | 0.21×0.02×0.02                                                   | 0.22×0.07×0.07                                                                                  | 0.22×0.07×0.07                                                                                  |
| Crystal system                                | Orthorhombic                                                     | Monoclinic                                                       | Triclinic                                                                                       | Triclinic                                                                                       |
| space group                                   | <i>P</i> bcn                                                     | <i>I</i> 2/a                                                     | <i>P</i> -1                                                                                     | <i>P</i> -1                                                                                     |
| <i>a</i> / Å                                  | 21.0945(5)                                                       | 13.9096(7)                                                       | 13.0164(6)                                                                                      | 13.1368(5)                                                                                      |
| <i>b</i> / Å                                  | 13.8077(7)                                                       | 14.1046(7)                                                       | 13.3435(6)                                                                                      | 13.4389(5)                                                                                      |
| <i>c</i> / Å                                  | 12.4172(2)                                                       | 21.0770(10)                                                      | 14.5787(7)                                                                                      | 14.8346(5)                                                                                      |
| $\alpha$ / °                                  | 90.00                                                            | 90.00                                                            | 102.051(6)                                                                                      | 101.664(3)                                                                                      |
| $\beta$ / °                                   | 90.00                                                            | 107.985(6)                                                       | 92.764(6)                                                                                       | 93.457(3)                                                                                       |
| $\gamma$ / °                                  | 90.00                                                            | 90.00                                                            | 116.503(7)                                                                                      | 116.863(4)                                                                                      |
| <i>V</i> / Å <sup>3</sup>                     | 3616.7(2)                                                        | 3933.0(3)                                                        | 2194.51(18)                                                                                     | 2253.37(14)                                                                                     |
| <i>Z</i>                                      | 4                                                                | 4                                                                | 1                                                                                               | 1                                                                                               |
| <i>d</i> <sub>calc</sub> / g·cm <sup>-3</sup> | 1.873                                                            | 1.818                                                            | 1.907                                                                                           | 1.857                                                                                           |
| $\mu$ / mm <sup>-1</sup>                      | 10.522                                                           | 5.069                                                            | 5.698                                                                                           | 5.549                                                                                           |
| 2 $\theta$ <sub>max</sub> / °                 | 145.34                                                           | 57.34                                                            | 57.74                                                                                           | 57.82                                                                                           |
| Data / restraints / parameters                | 3582/0/195                                                       | 4302/0/213                                                       | 10203/0/488                                                                                     | 10331/0/488                                                                                     |
| <i>GooF</i>                                   | 1.045                                                            | 0.974                                                            | 1.035                                                                                           | 1.011                                                                                           |
| <i>R</i> [I>2 $\sigma$ (I)]                   | 0.0458                                                           | 0.0494                                                           | 0.0532                                                                                          | 0.0591                                                                                          |
| <i>wR</i> <sub>2</sub>                        | 0.1168                                                           | 0.0831                                                           | 0.1133                                                                                          | 0.1228                                                                                          |

**Table S2:** Selected crystallographic data for **4**·CuBr<sub>4</sub>, **5**·Cu<sub>2</sub>Br<sub>6</sub>, **6**·CuBr<sub>2</sub>·CH<sub>3</sub>CN, and **7**·CuBr<sub>2</sub>.

|                                               | <b>4</b> ·CuBr <sub>4</sub>                                                     | <b>5</b> ·Cu <sub>2</sub> Br <sub>6</sub>                                                     | <b>6</b> ·CuBr <sub>2</sub> ·CH <sub>3</sub> CN                                  | <b>7</b> ·CuBr <sub>2</sub>                                                     |
|-----------------------------------------------|---------------------------------------------------------------------------------|-----------------------------------------------------------------------------------------------|----------------------------------------------------------------------------------|---------------------------------------------------------------------------------|
| CCDC number                                   | 1046219                                                                         | 1046220                                                                                       | 1046221                                                                          | 1046222                                                                         |
| Empirical formula                             | C <sub>34</sub> H <sub>28</sub> O <sub>4</sub> S <sub>8</sub> CuBr <sub>4</sub> | C <sub>34</sub> H <sub>28</sub> O <sub>4</sub> S <sub>8</sub> Cu <sub>2</sub> Br <sub>6</sub> | C <sub>40</sub> H <sub>28</sub> NO <sub>8</sub> S <sub>8</sub> CuBr <sub>2</sub> | C <sub>42</sub> H <sub>36</sub> O <sub>8</sub> S <sub>8</sub> CuBr <sub>2</sub> |
| Formula weight                                | 1140.22                                                                         | 1363.58                                                                                       | 1130.48                                                                          | 1148.55                                                                         |
| Temperature / K                               | 293(2)                                                                          | 293(2)                                                                                        | 293(2)                                                                           | 293(2)                                                                          |
| $\lambda$ / Å                                 | 0.71073                                                                         | 1.54184                                                                                       | 0.71073                                                                          | 0.71073                                                                         |
| Crystal size / mm <sup>3</sup>                | 0.31×0.05×0.05                                                                  | 0.31×0.22×0.11                                                                                | 0.35×0.21×0.15                                                                   | 0.35×0.22×0.15                                                                  |
| Crystal system                                | Orthorhombic                                                                    | Triclinic                                                                                     | Triclinic                                                                        | Triclinic                                                                       |
| space group                                   | <i>Pccn</i>                                                                     | <i>P</i> -1                                                                                   | <i>P</i> -1                                                                      | <i>P</i> -1                                                                     |
| <i>a</i> / Å                                  | 12.9103(8)                                                                      | 8.8766(5)                                                                                     | 8.0605(3)                                                                        | 12.8898(12)                                                                     |
| <i>b</i> / Å                                  | 19.5008(5)                                                                      | 11.3774(5)                                                                                    | 11.1170(7)                                                                       | 14.8147(13)                                                                     |
| <i>c</i> / Å                                  | 16.3696(5)                                                                      | 12.1805(5)                                                                                    | 13.7852(6)                                                                       | 14.8279(13)                                                                     |
| $\alpha$ / °                                  | 90.00                                                                           | 92.375(3)                                                                                     | 89.253(4)                                                                        | 107.327(8)                                                                      |
| $\beta$ / °                                   | 90.00                                                                           | 105.574(4)                                                                                    | 88.684(4)                                                                        | 93.858(7)                                                                       |
| $\gamma$ / °                                  | 90.00                                                                           | 112.882(4)                                                                                    | 80.707(4)                                                                        | 115.350(9)                                                                      |
| <i>V</i> / Å <sup>3</sup>                     | 4121.2(3)                                                                       | 1076.89(9)                                                                                    | 1218.68(10)                                                                      | 2379.7(3)                                                                       |
| <i>Z</i>                                      | 4                                                                               | 1                                                                                             | 1                                                                                | 2                                                                               |
| <i>d</i> <sub>calc</sub> / g·cm <sup>-3</sup> | 1.838                                                                           | 2.103                                                                                         | 1.540                                                                            | 1.603                                                                           |
| $\mu$ / mm <sup>-1</sup>                      | 4.850                                                                           | 11.681                                                                                        | 2.478                                                                            | 2.538                                                                           |
| $2\theta_{\max}$ / °                          | 57.1                                                                            | 145.28                                                                                        | 57.26                                                                            | 57.18                                                                           |
| Data / restraints / parameters                | 4816/0/231                                                                      | 4230/0/245                                                                                    | 5499/0/286                                                                       | 10692/0/550                                                                     |
| <i>Goof</i>                                   | 1.004                                                                           | 1.062                                                                                         | 1.037                                                                            | 1.085                                                                           |
| <i>R</i> [ <i>I</i> >2σ( <i>I</i> )]          | 0.0516                                                                          | 0.0354                                                                                        | 0.0601                                                                           | 0.0839                                                                          |
| <i>wR</i> <sub>2</sub>                        | 0.0704                                                                          | 0.0899                                                                                        | 0.1618                                                                           | 0.2016                                                                          |

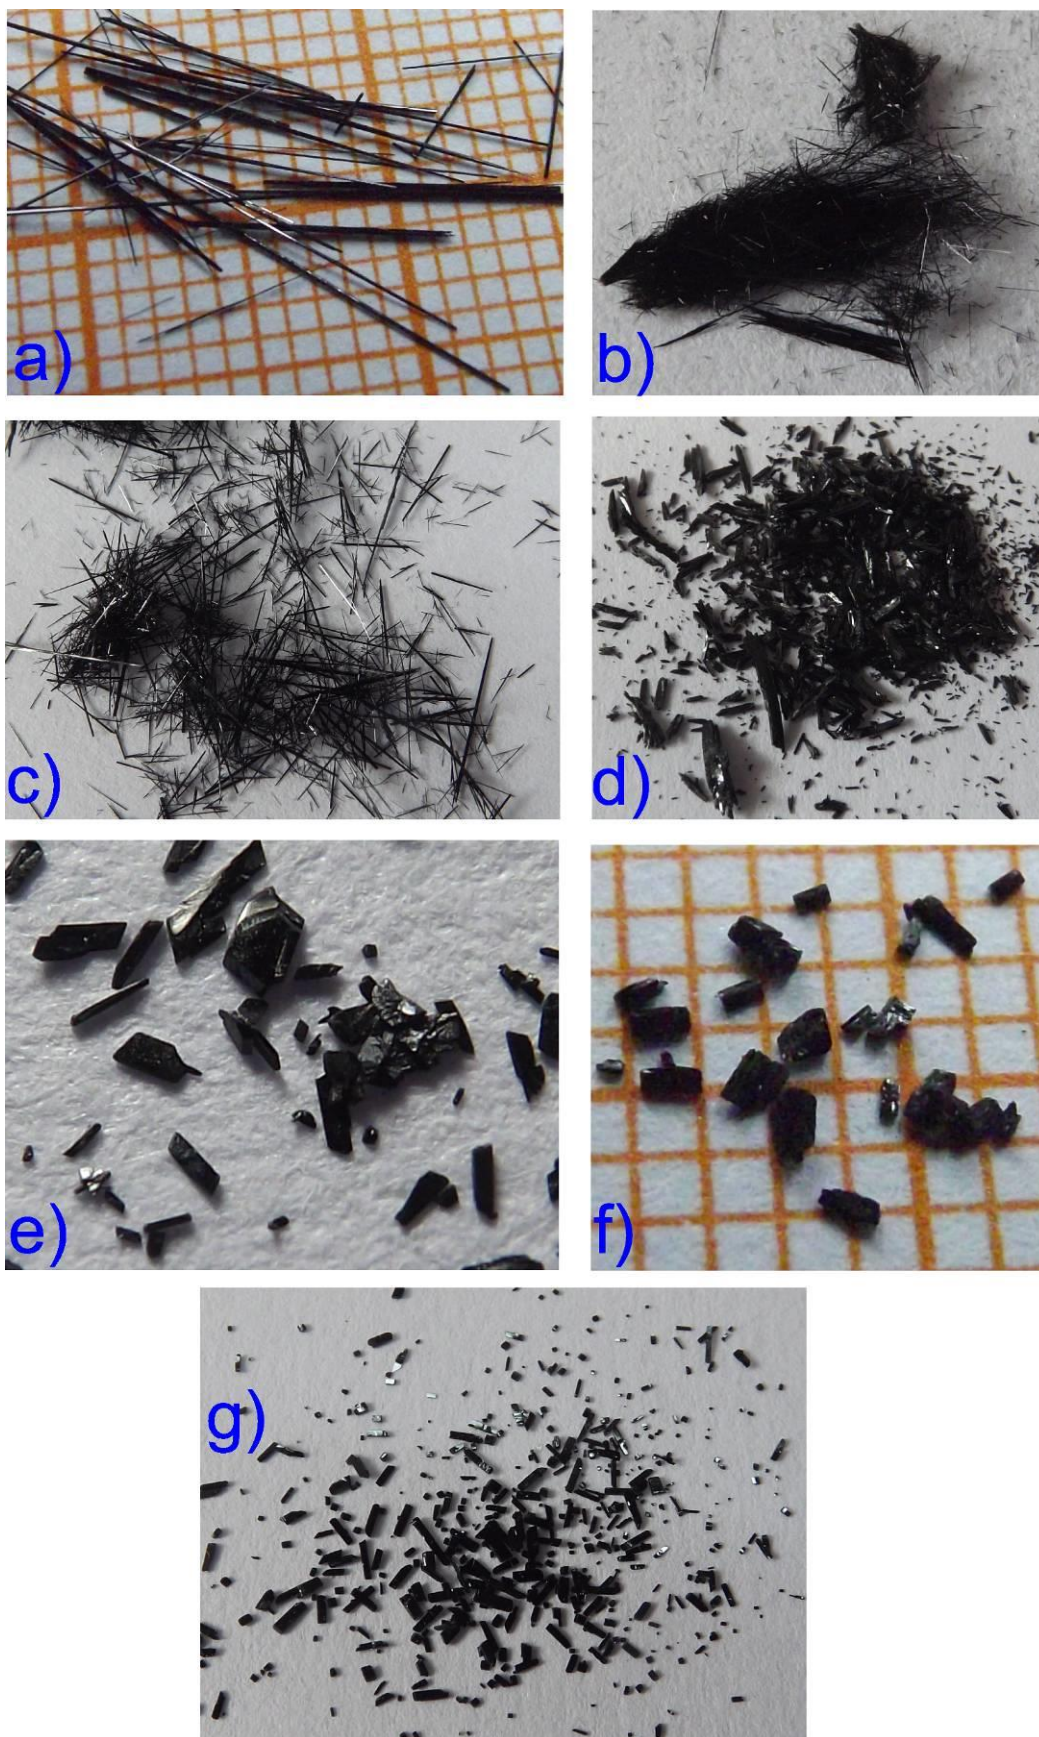

**Figure S1:** Photographs for the single crystals of salts: a)  $1 \cdot \text{CuBr}_4$ ; b)  $2 \cdot \text{CuBr}_4$ ; c)  $3 \cdot (\text{CuBr}_4)_{0.5} \cdot \text{CuBr}_3 \cdot \text{THF}$ ; d)  $4 \cdot \text{CuBr}_4$ ; e)  $5 \cdot \text{Cu}_2\text{Br}_6$ ; f)  $6 \cdot \text{CuBr}_2 \cdot \text{CH}_3\text{CN}$ ; g)  $7 \cdot \text{CuBr}_2$ .

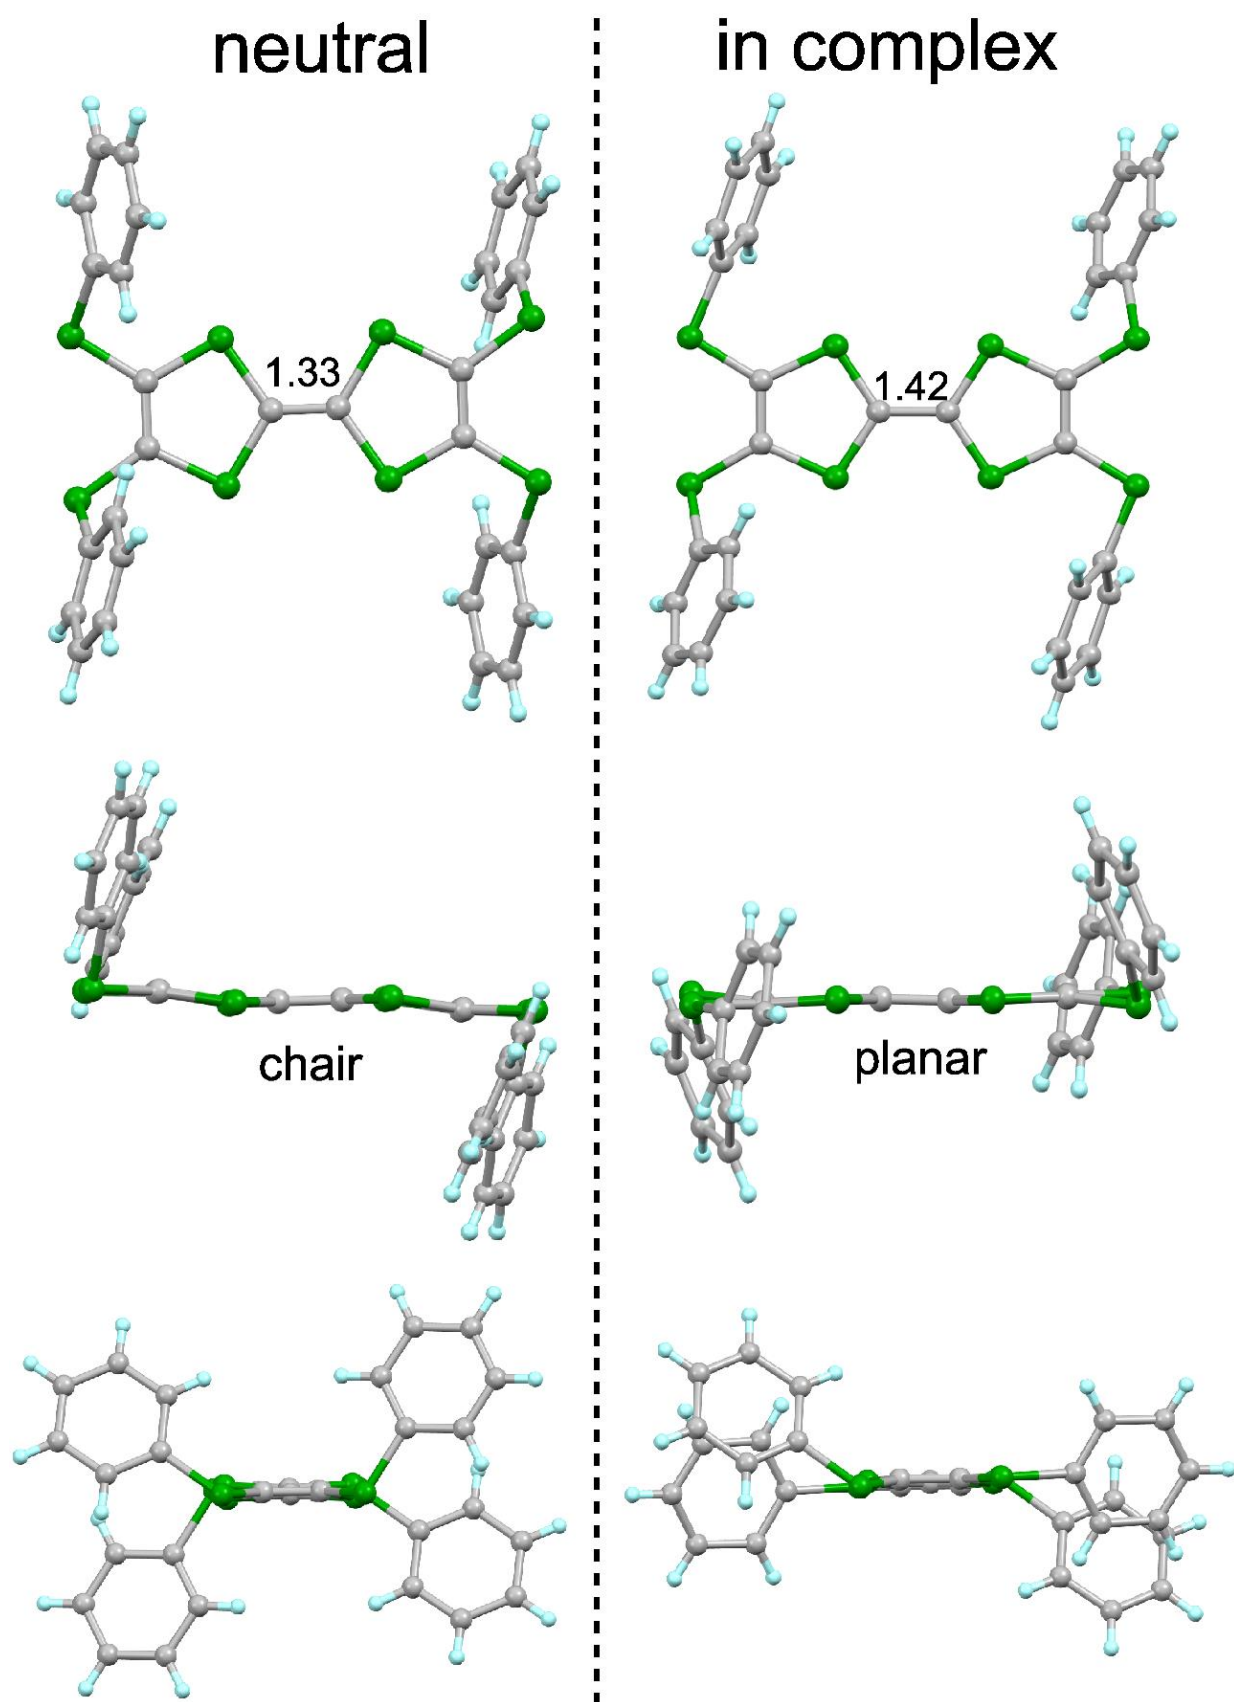

**Figure S2:** Comparison of the molecular geometry of **1** in the neutral state and in **1·CuBr<sub>4</sub>**.



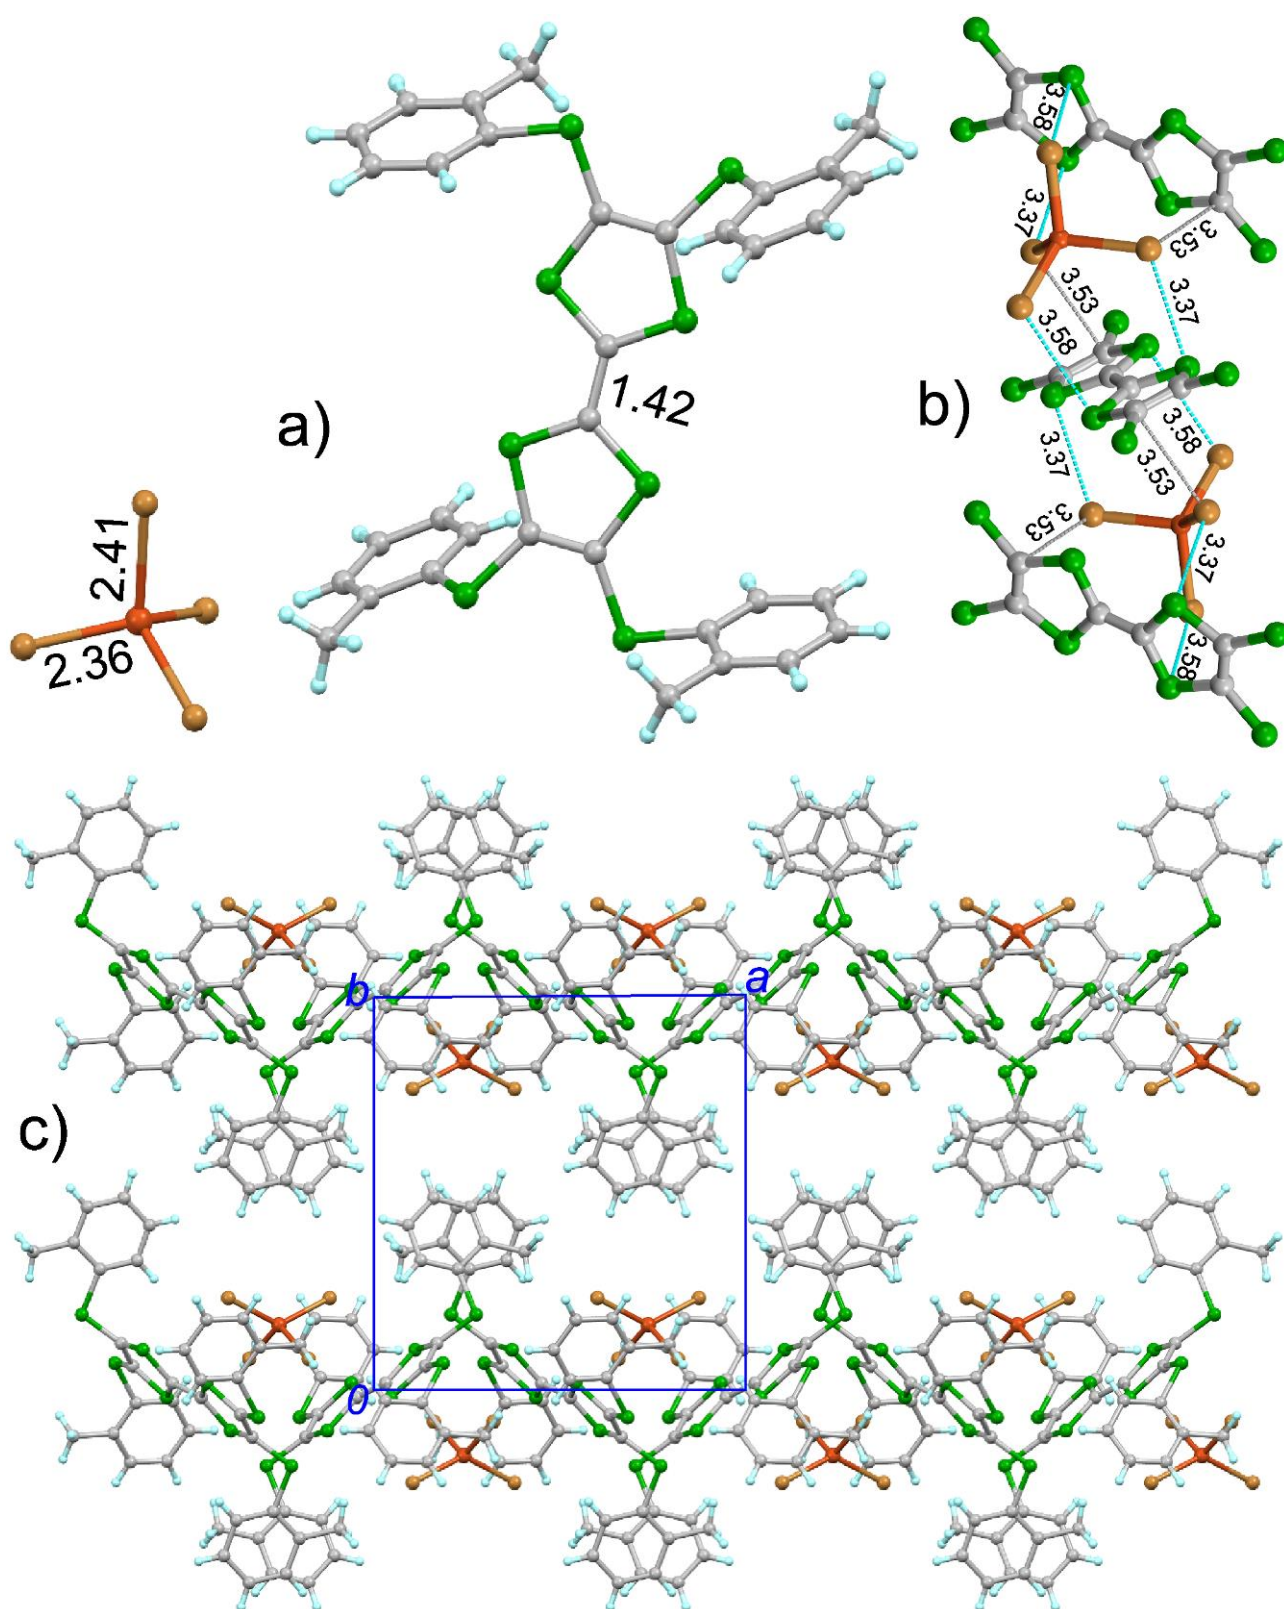

**Figure S3:** Crystal structure of  $2 \cdot \text{CuBr}_4$ : a) unit cell contents with the typical bond lengths shown (in unit of Å); b) interaction between  $[\text{Cu}(\text{II})\text{Br}_4]^{2-}$  ion and the central TTF core of **2**, where the cyan and grey dashed lines represent  $\text{Br} \cdots \text{S}$  and  $\text{Br} \cdots \text{C}$  contacts (Å), respectively; c) the packing structure viewed along the  $a$ -axis.

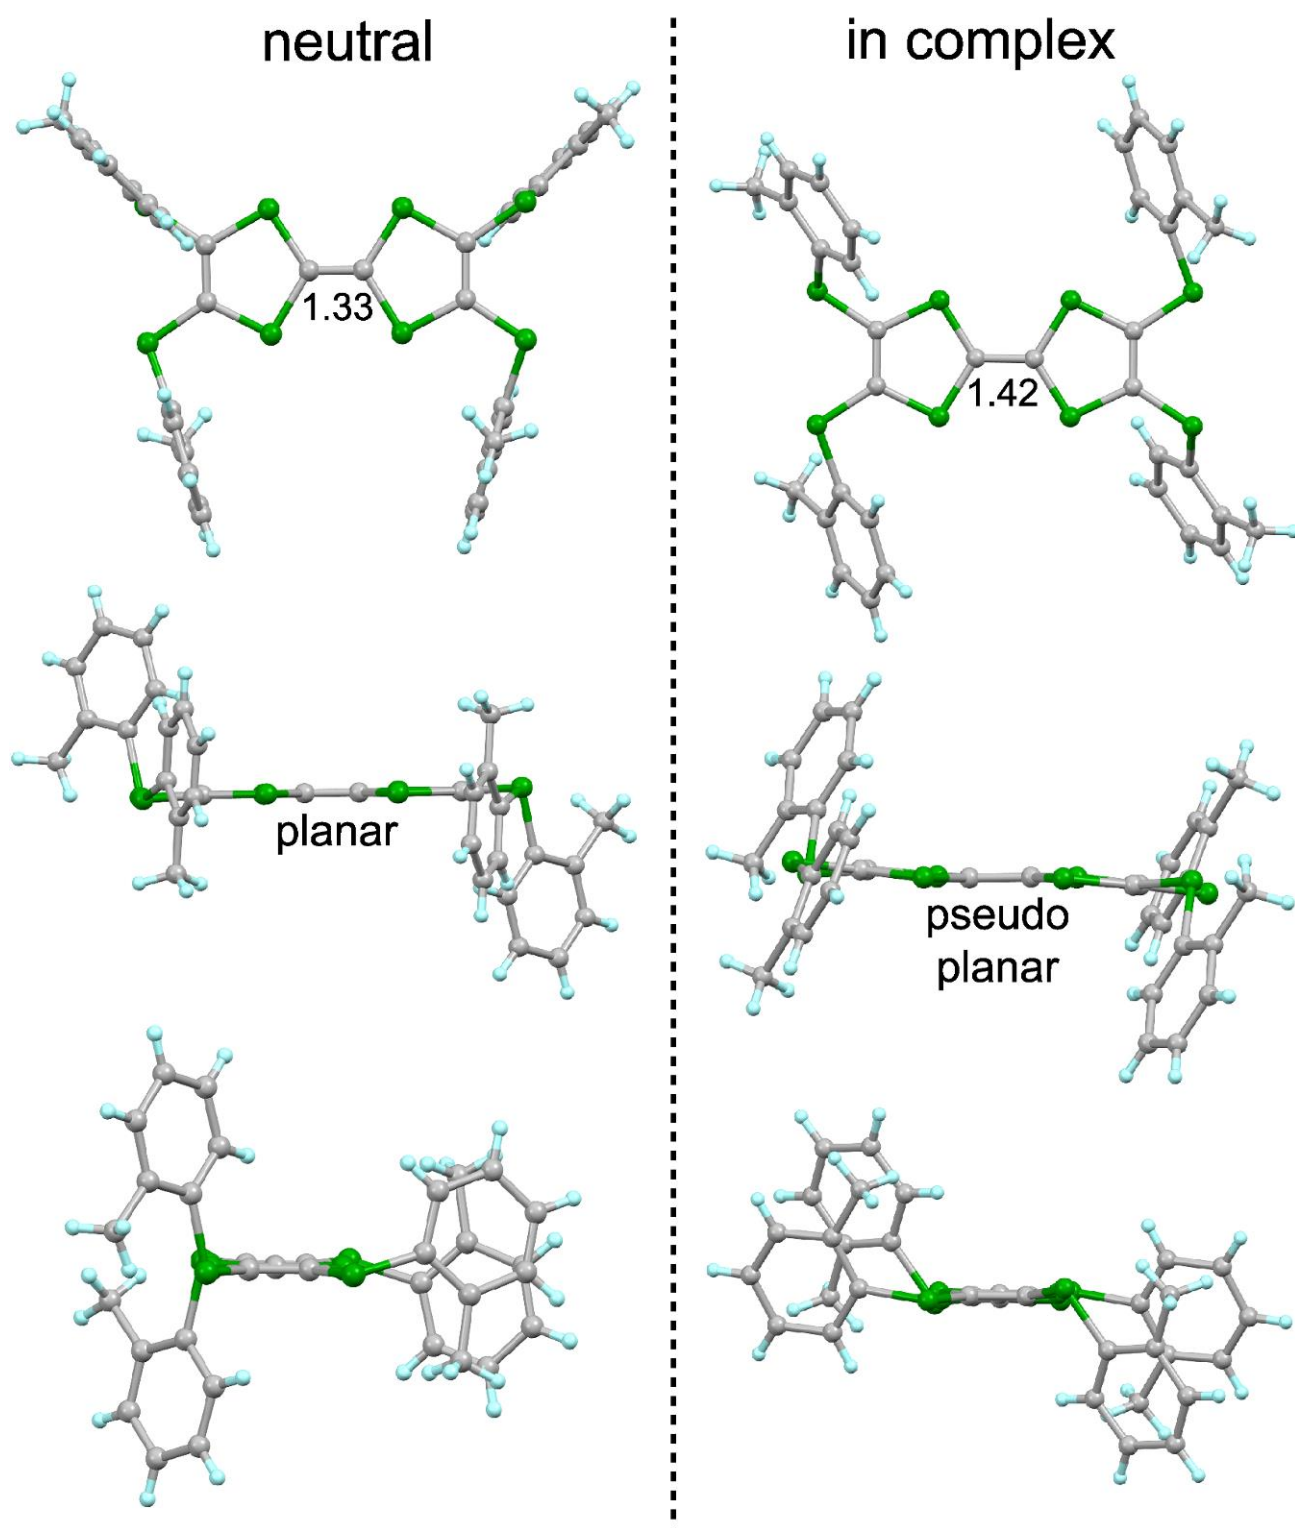

**Figure S4:** Comparison of the molecular geometry of **2** in the neutral state and in **2**·CuBr<sub>4</sub>.



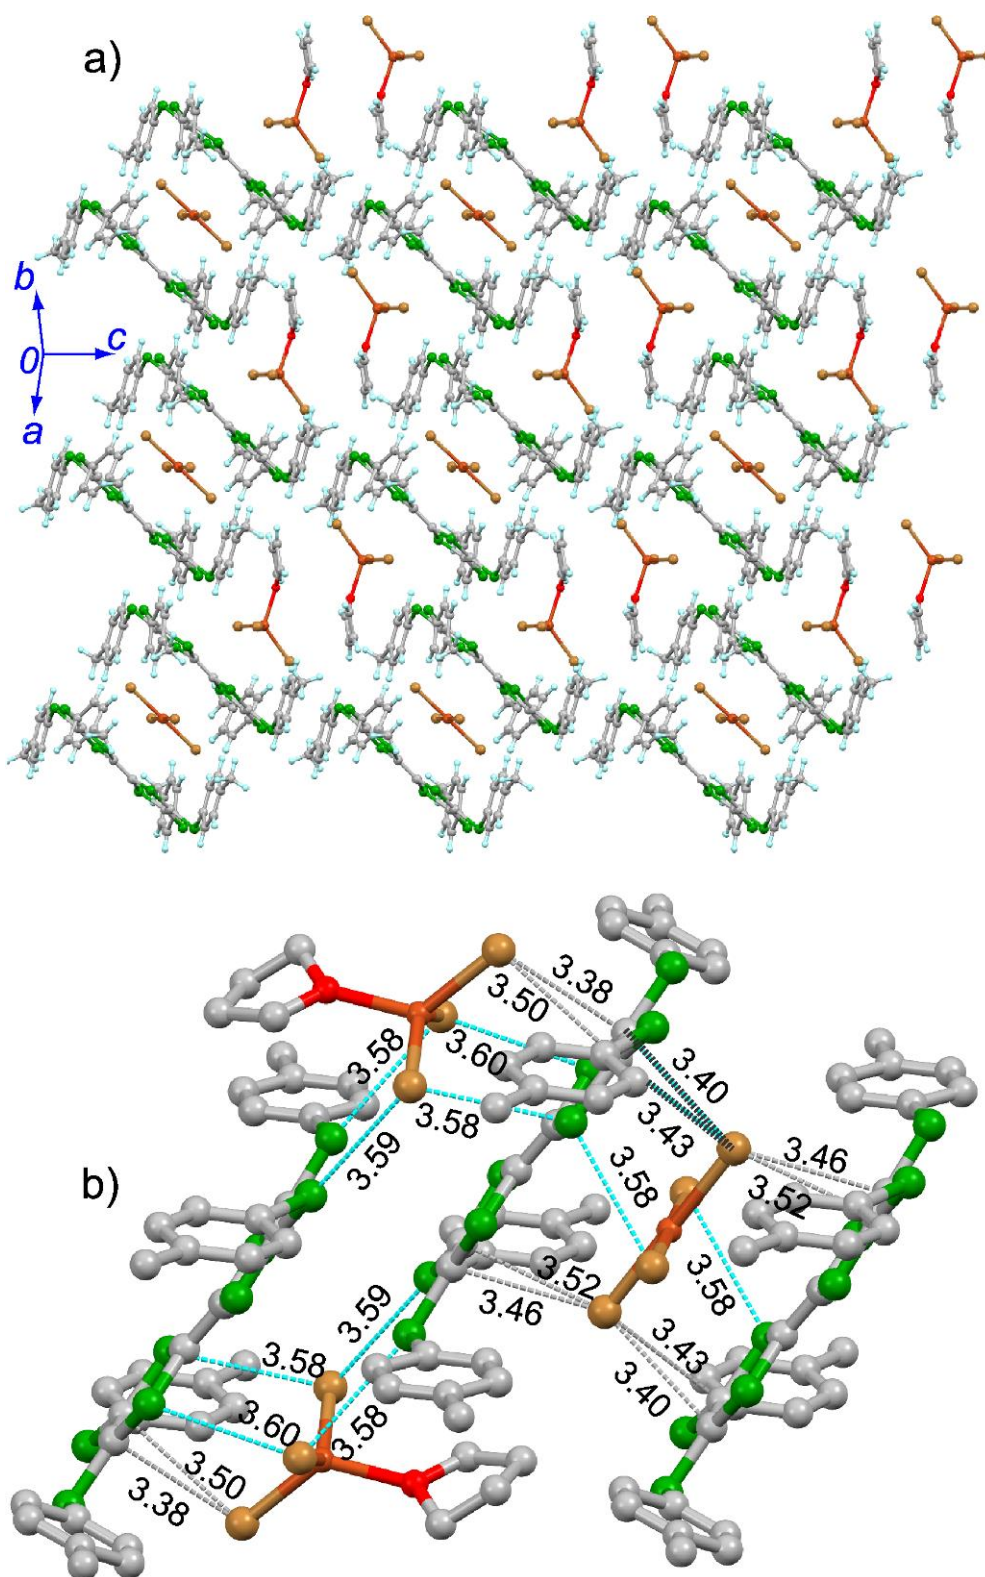

**Figure S5:** Crystal structure of  $3 \cdot (\text{CuBr}_4)_{0.5} \cdot \text{CuBr}_3 \cdot \text{THF}$  at 173 K: a) packing structure; b) interaction between the anions and the central TTF core of **3**, where cyan and grey dashed lines represent Br...S and Br...C contacts (Å), respectively. In comparison with the structure at 291 K, the intermolecular interactions between **3** and anions at 173 K are significantly strengthened.

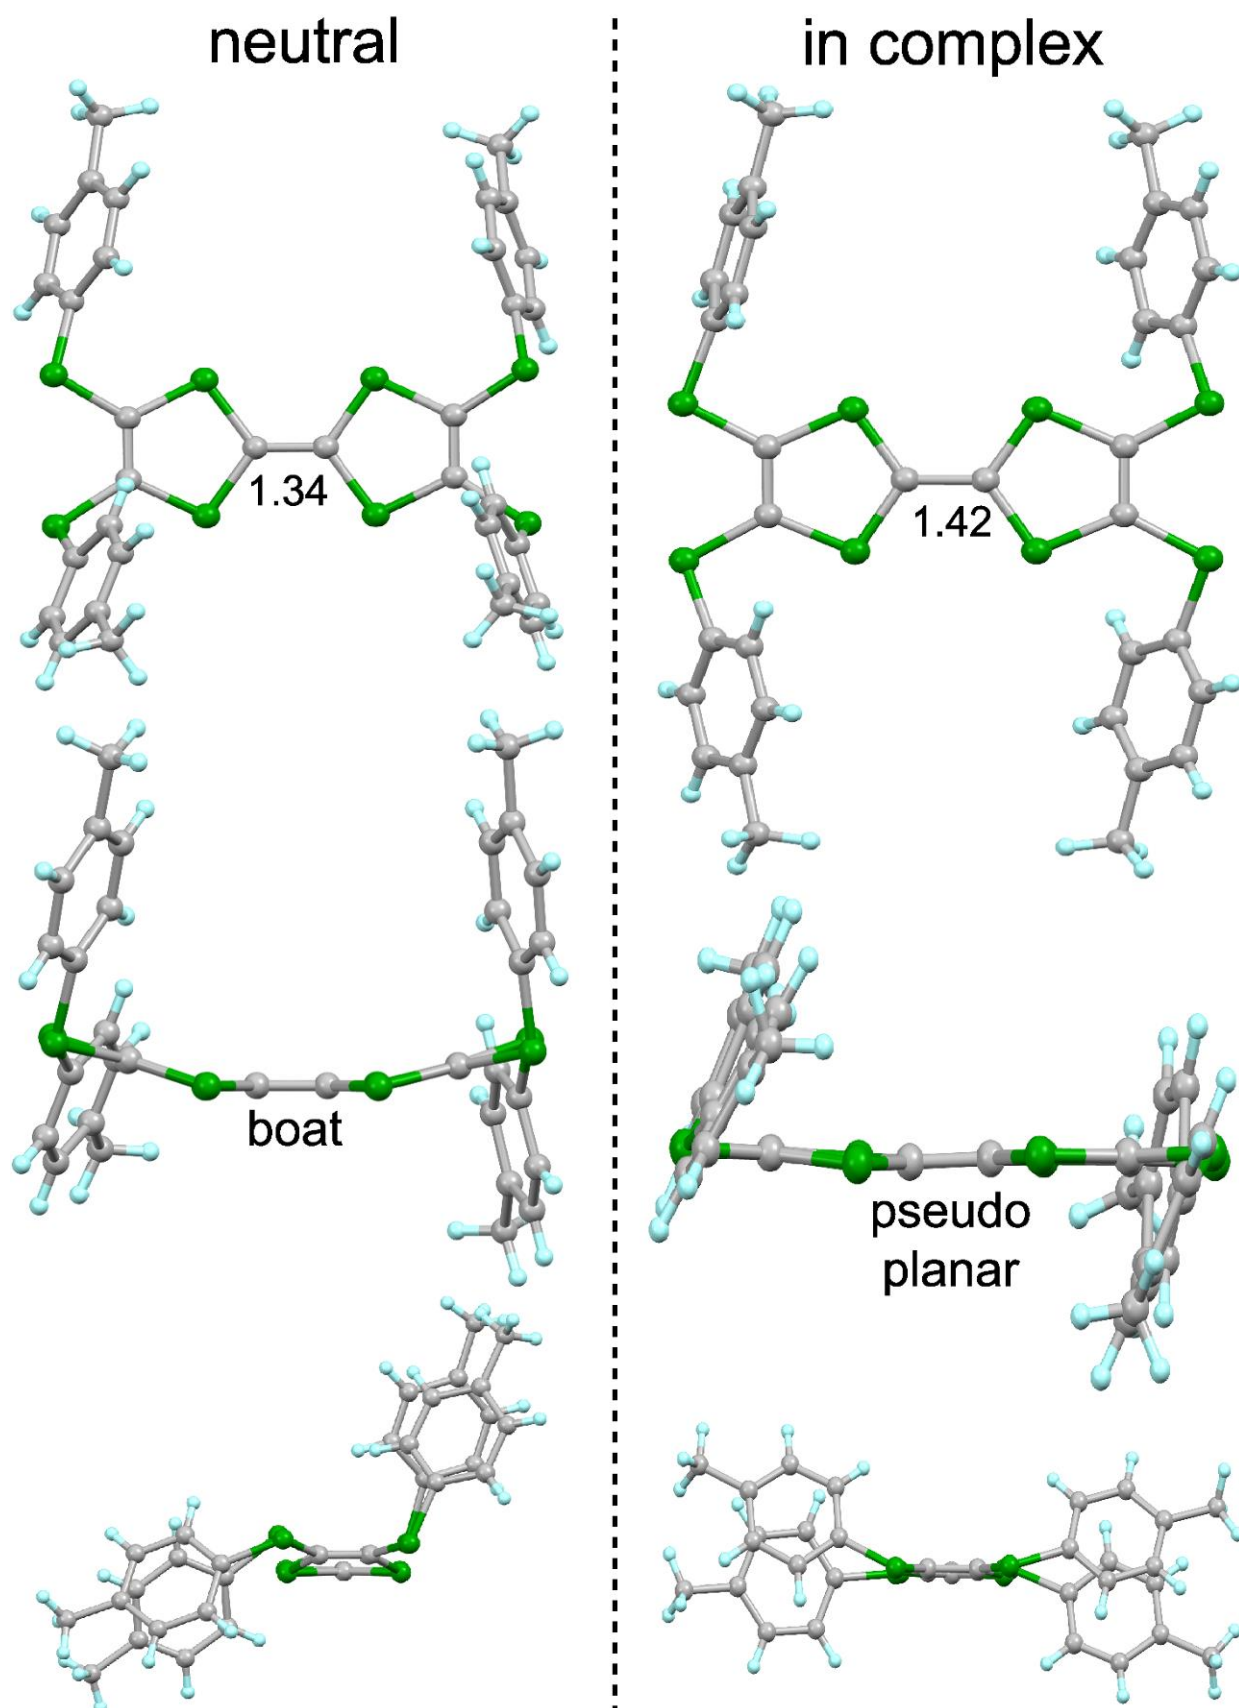

**Figure S6:** Comparison of the molecular geometry of **3** in neutral state and in  $3 \cdot (\text{CuBr}_4)_{0.5} \cdot \text{CuBr}_3 \cdot \text{THF}$ .

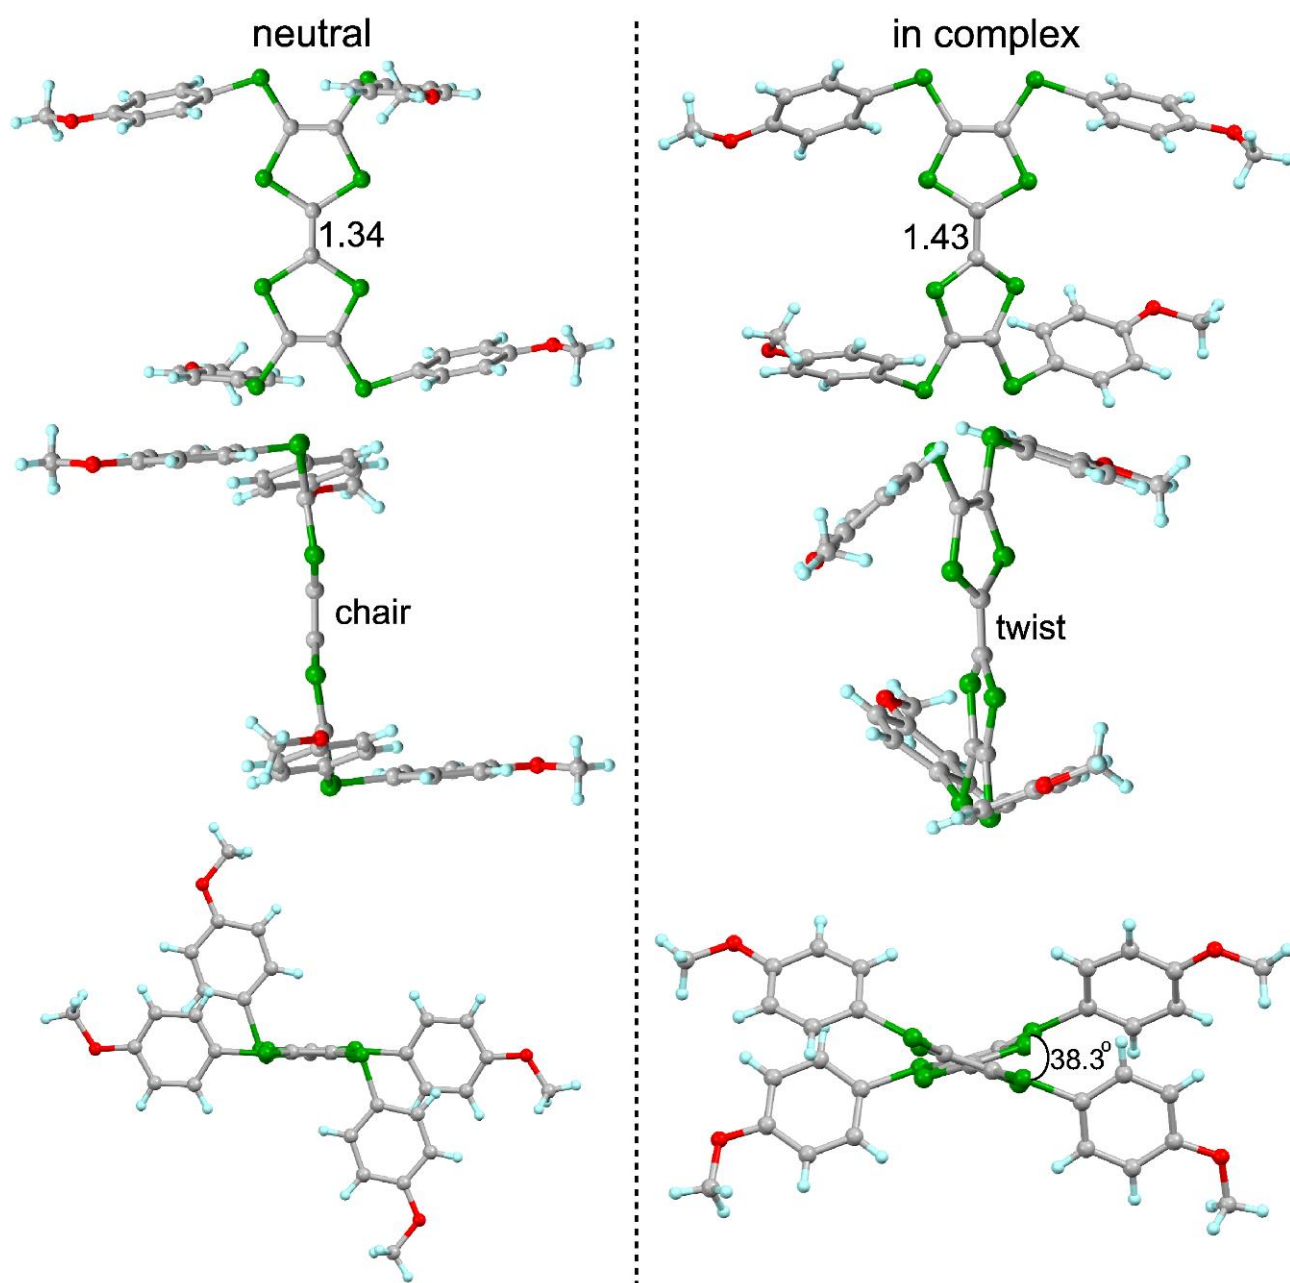

**Figure S7:** Comparison of the molecular geometry of **4** in the neutral state and in  $4 \cdot \text{CuBr}_4$ .

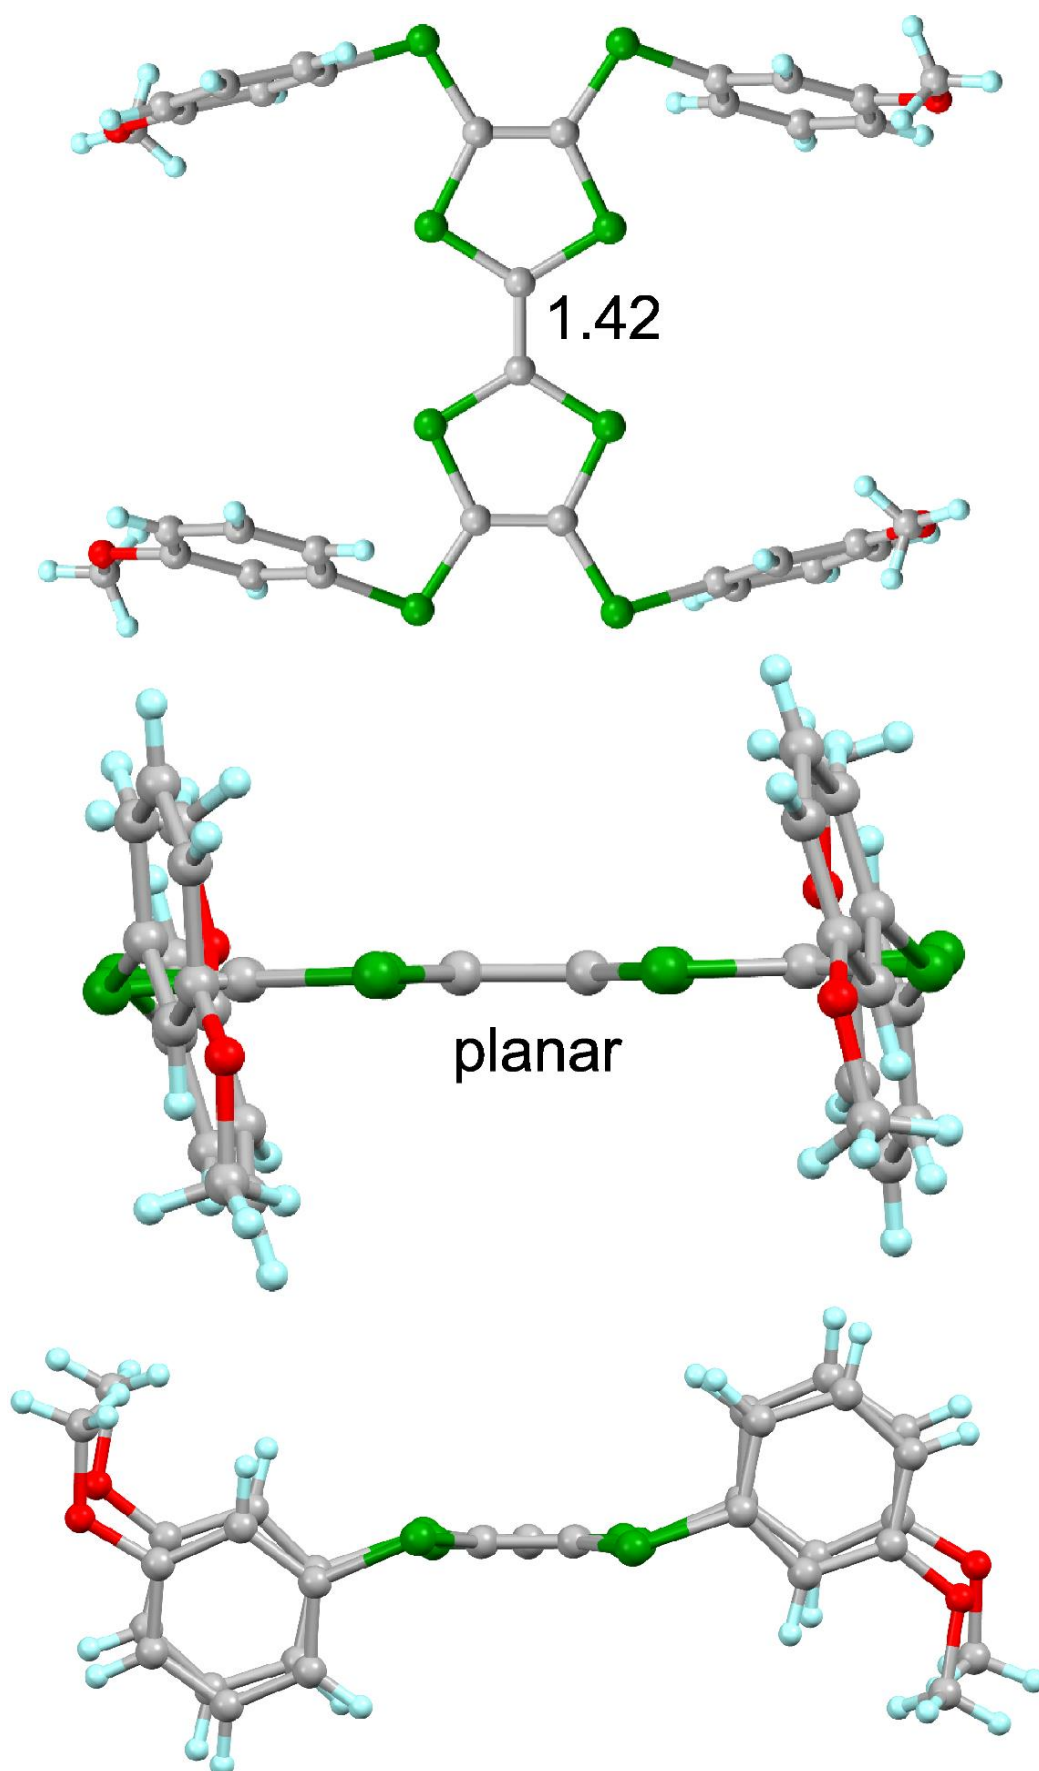

**Figure S8:** Molecular geometry of **5** in **5·Cu<sub>2</sub>Br<sub>6</sub>**.



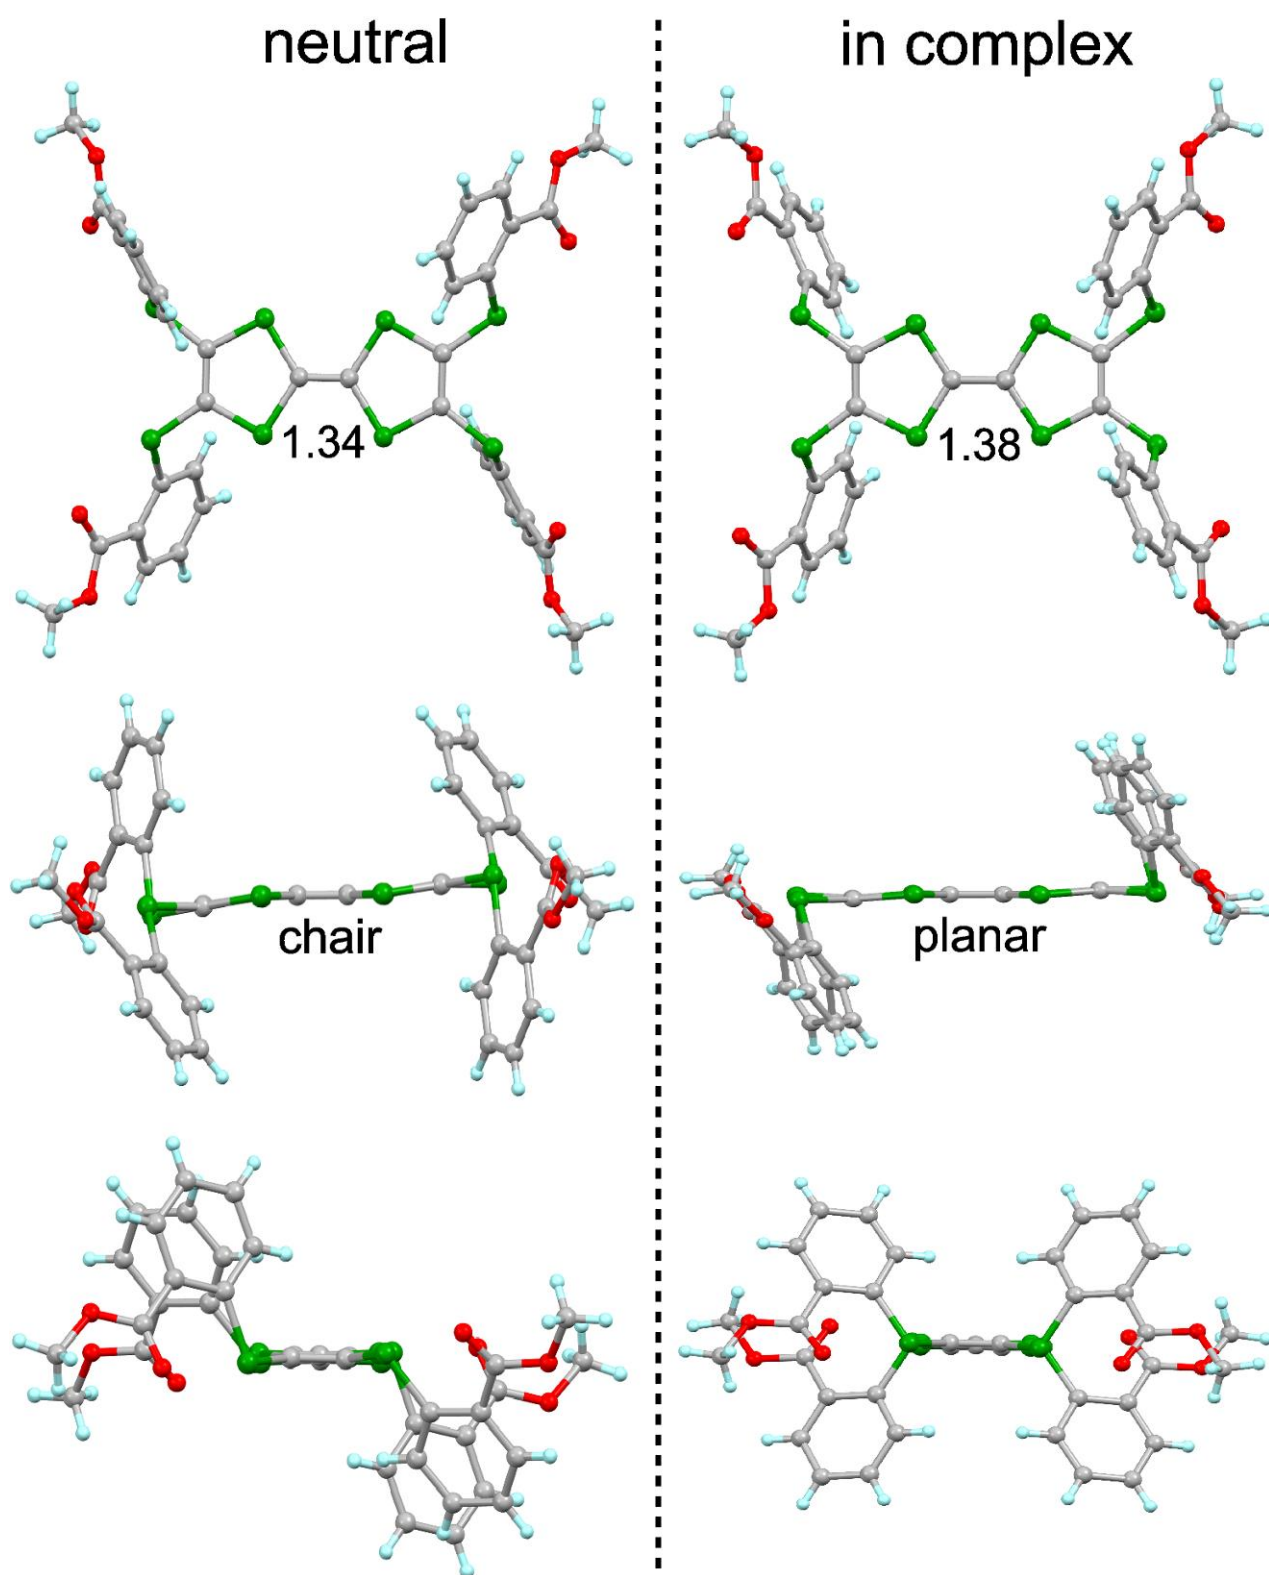

**Figure S9:** Comparison of the molecular geometry of **6** in neutral state and in **6**·CuBr<sub>2</sub>·CH<sub>3</sub>CN.



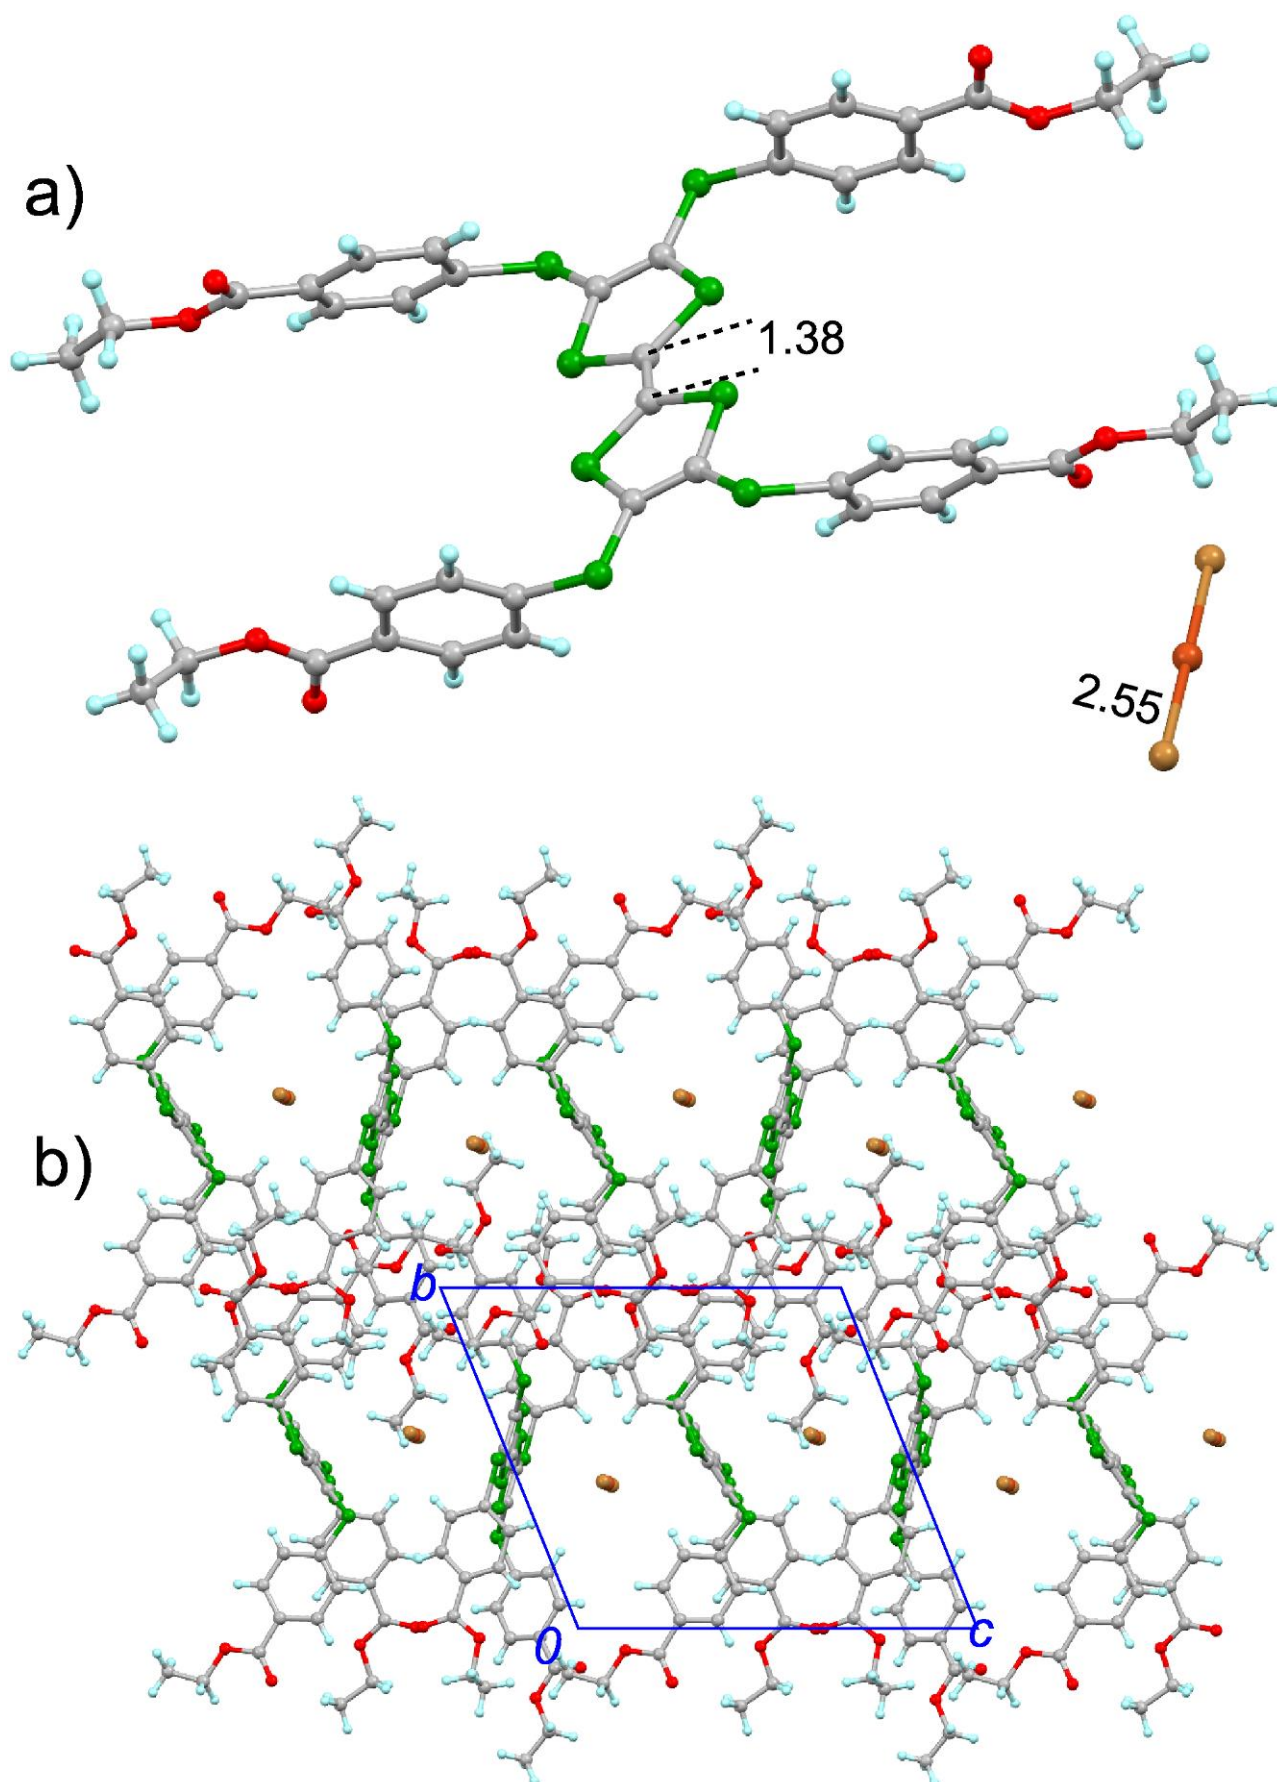

**Figure S10:** Crystal structure of  $7 \cdot \text{CuBr}_2$ : a) unit cell contents with the typical bond lengths shown (Å); b) packing structure viewed along the crystallographic  $a$ -axis.

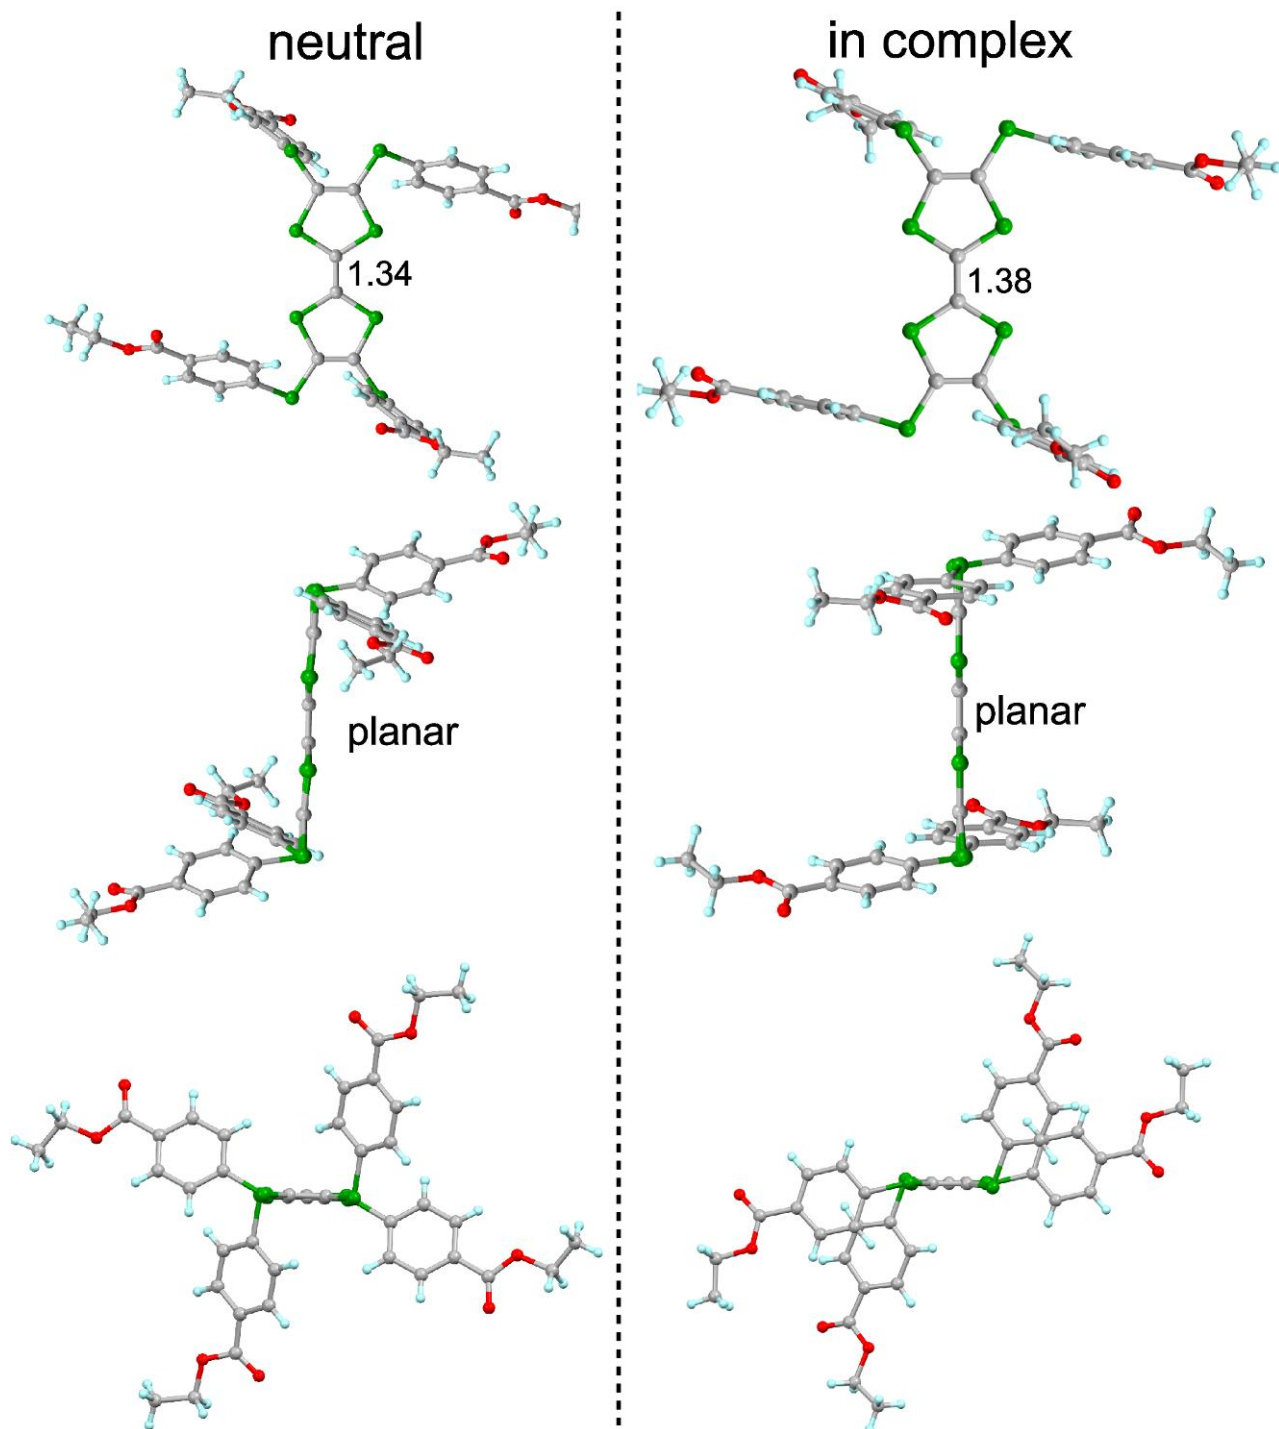

**Figure S11:** Comparison of the molecular geometry of **7** in the neutral state and in  $7 \cdot \text{CuBr}_2$ .
